# Supplementary material for: Manganese, Fluorine, and Nitrogen Co-Doped Bronze Titanium Dioxide Nanotubes with Improved Lithium-Ion Storage Properties
Source: MDPI journal article supplement (doi:10.3390/batteries9040229), 2023-04-17
Supplement: s1 [file s1]

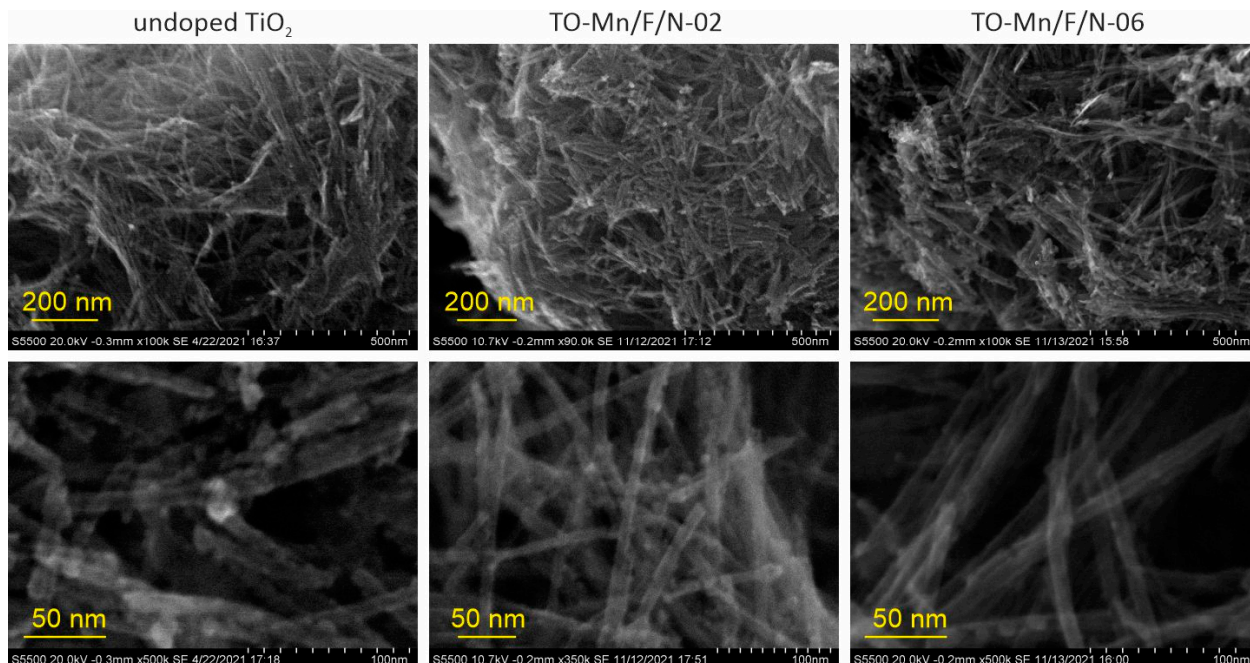

**Figure S1.** SEM-micrographs for the undoped  $\text{TiO}_2$ , TO-Mn/F/N-02 and TO-Mn/F/N-06 products

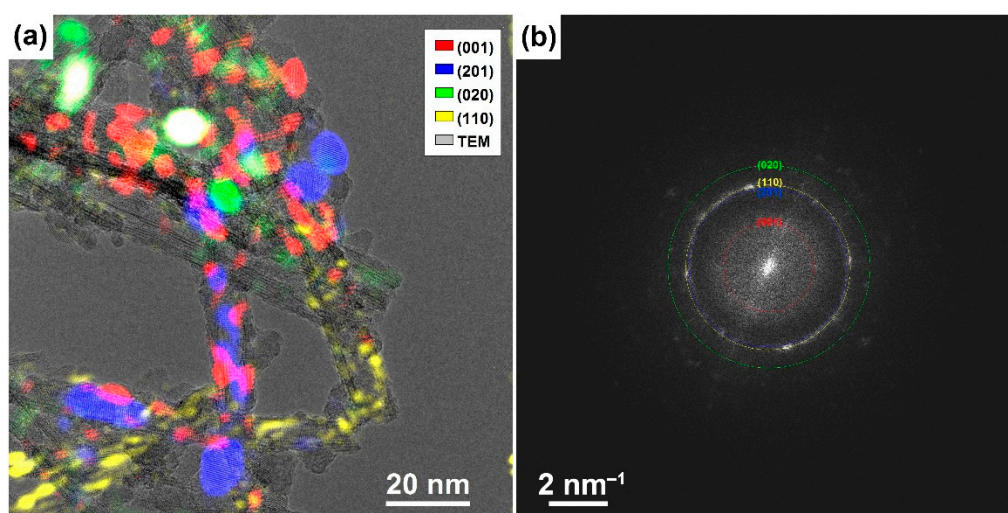

**Figure S2.** (a) Crystallographic orientation of  $\text{TiO}_2(\text{B})$  crystals determined by HRTEM imaging in the TO-Mn/F/N-04 sample and (b) corresponding Fast Fourier Transform pattern

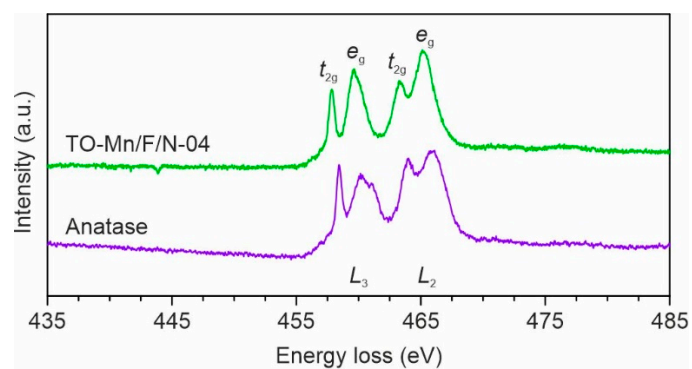

**Figure S3.** Experimental EELS spectra of Ti  $L_{2,3}$ -edges for the TO-Mn/F/N-04 sample and the commercial anatase  $\text{TiO}_2$  examined for comparison

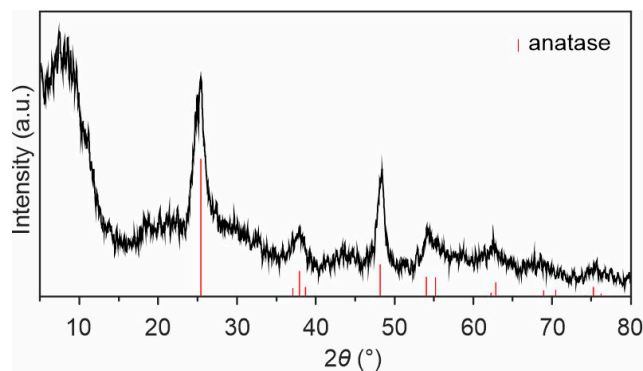

**Figure S4.** XRD pattern of product doped with 4 at.% Mn, synthesized without  $\text{NH}_4\text{HF}_2$  (Bruker D8Advance diffractometer,  $\text{CuK}\alpha$ -radiation)

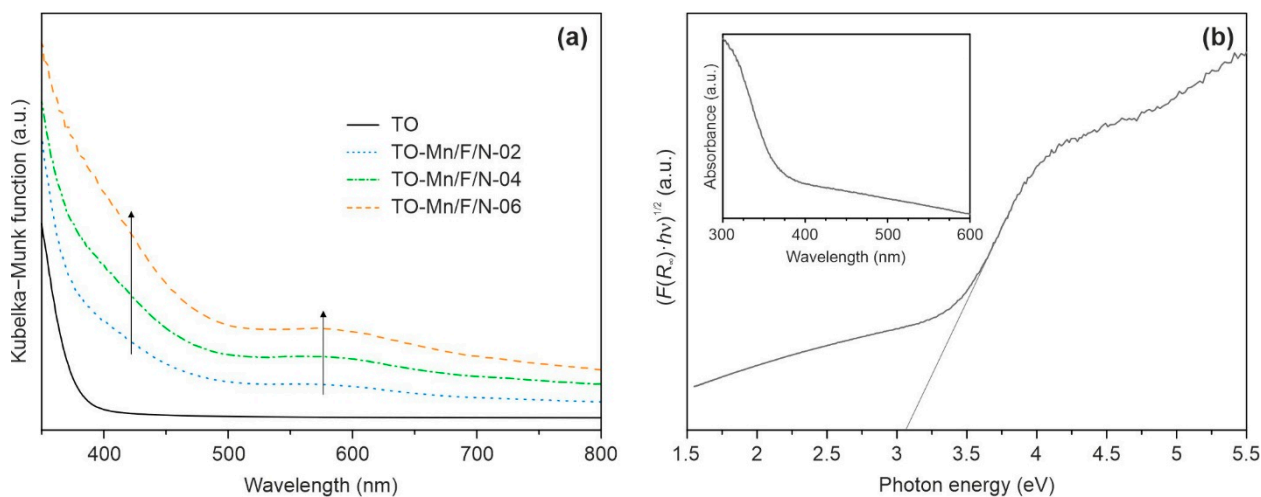

**Figure S5.** (a) UV-vis diffuse reflectance spectra represented as Kubelka-Munk function against wavelength plots for the undoped  $\text{TiO}_2$ , TO-Mn/F/N-02, TO-Mn/F/N-04, and TO-Mn/F/N-06 products and (b) Tauc plot for the (F, N) co-doped  $\text{TiO}_2$  with the corresponding UV-vis absorption curve (inset)

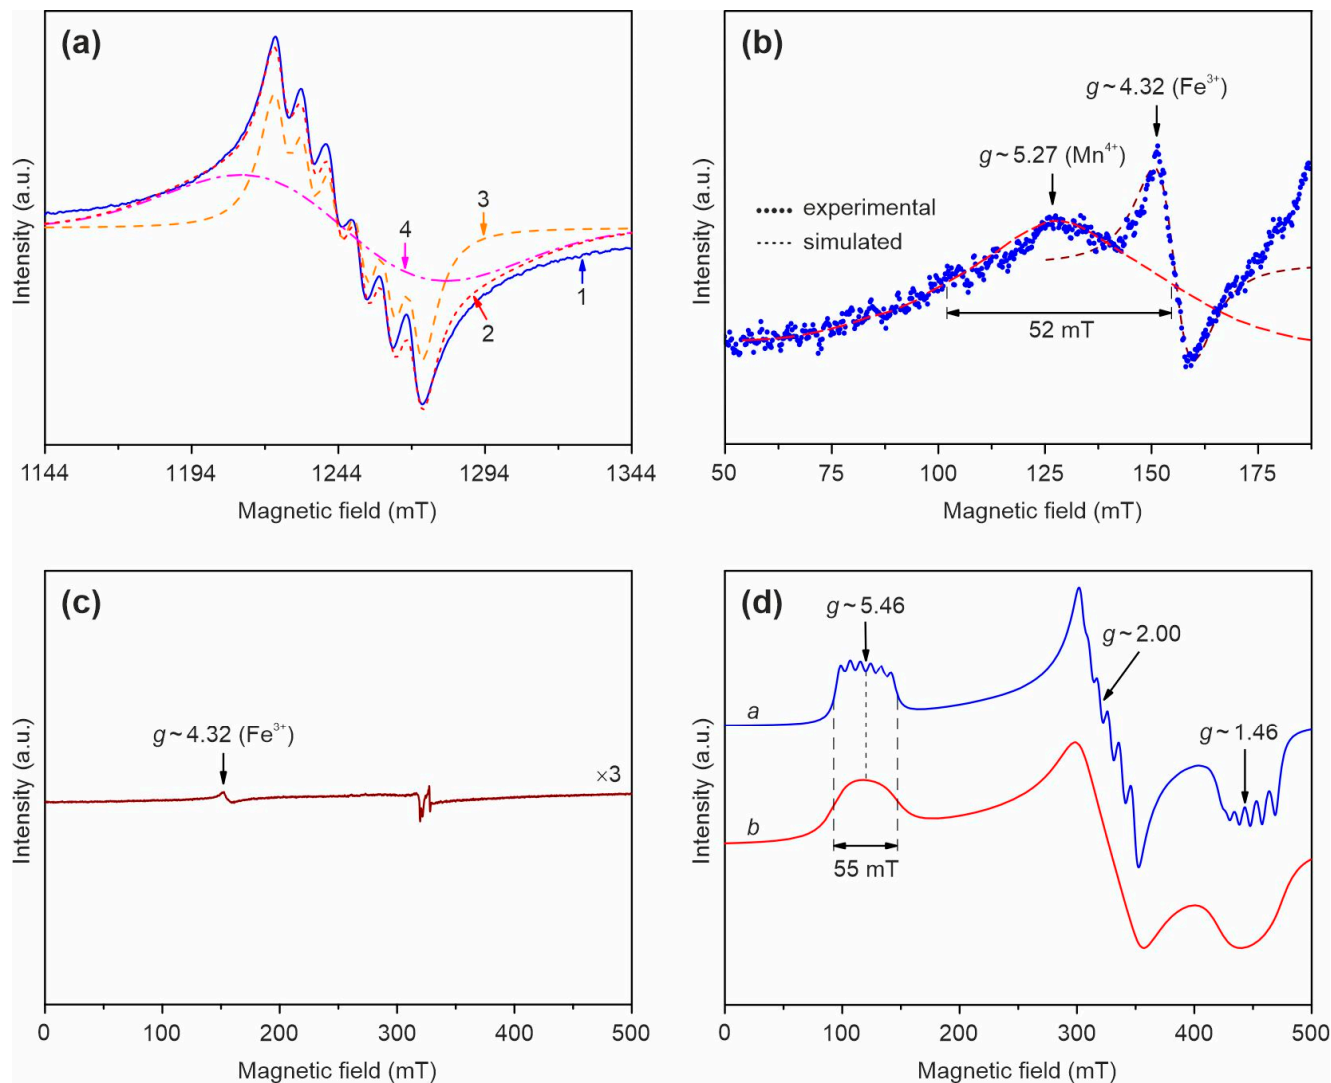

**Figure S6.** (a) Approximation (1) of the experimental Q-band EPR spectrum of the TO-Mn/F/N-04 sample at room temperature (2) by the sum of the spectrum with a sextet structure (3) and a single line with a Gaussian contour (4), (b) low field region of the X-band EPR spectrum at  $-160\text{ }^{\circ}\text{C}$ , (c) the X-band EPR spectrum of undoped titanium dioxide, (d) simulated X-band EPR spectra of  $\text{Mn}^{4+}$  ions in the crystal fields with strong rhombic distortion; spectra “a” and “b” differ in the width ( $\Delta B$ ) of the hyperfine structure lines (see Table S4)

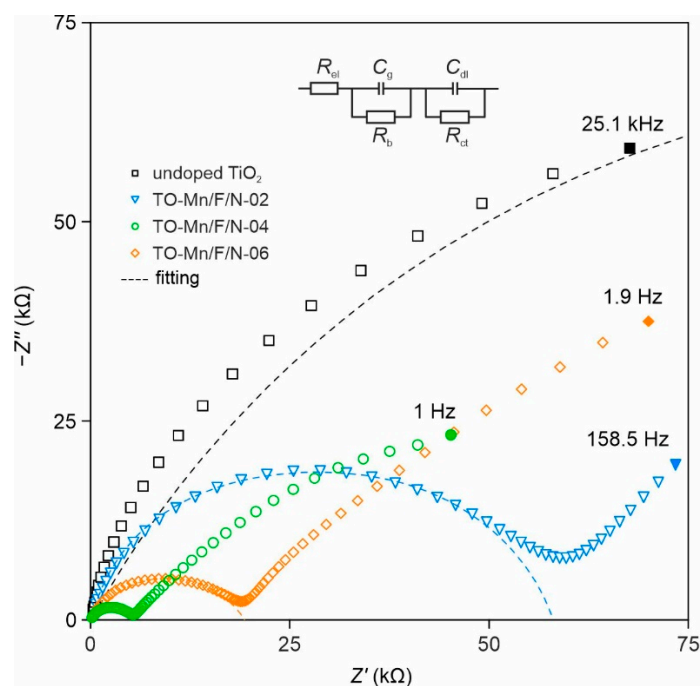

**Figure S7.** Zoom-in impedance spectra of the undoped  $\text{TiO}_2$ , TO-Mn/F/N-02, TO-Mn/F/N-04, and TO-Mn/F/N-06 materials and the EEC (inset) used for fitting

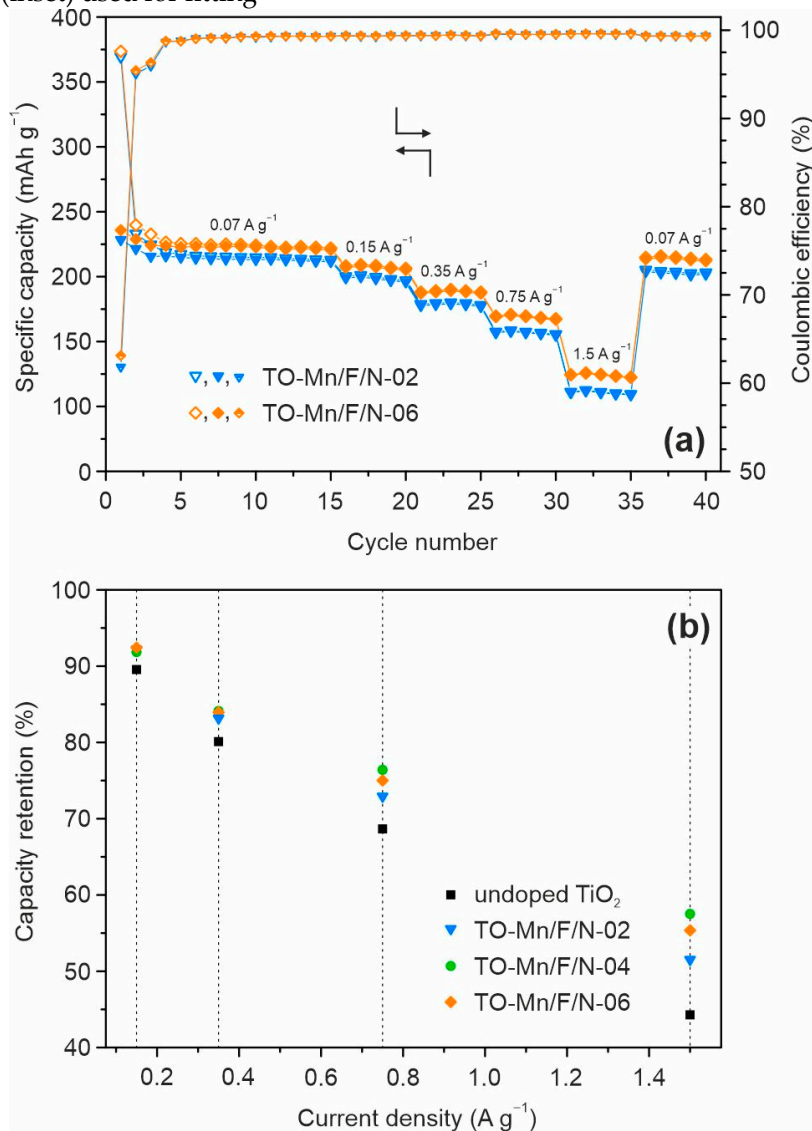

**Figure S8.** (a) Evolution of capacity during cycling under various current loads for TO-Mn/F/N-02 and TO-Mn/F/N-06 electrodes, (b) capacity retention at various current densities as compared to that at 70 mA g<sup>-1</sup> for undoped  $\text{TiO}_2$ , TO-Mn/F/N-02, TO-Mn/F/N-04, and TO-Mn/F/N-06 materials

**Table S1.** Specific surface area, total pore volume, band gap energy, and conductivity of TiO<sub>2</sub> samples co-doped with Mn, F, and N as compared to an unmodified one

| Sample                   | Specific surface area<br>(m <sup>2</sup> g <sup>-1</sup> )* | Total pore<br>volume (cm <sup>3</sup> g <sup>-1</sup> )* | Band gap energy<br>(eV) | Conductivity<br>(S cm <sup>-1</sup> ) |
|--------------------------|-------------------------------------------------------------|----------------------------------------------------------|-------------------------|---------------------------------------|
| Undoped TiO <sub>2</sub> | 145.6                                                       | 0.99                                                     | 3.14                    | 2.9·10 <sup>-7</sup>                  |
| TO-F/Mn-02               | 197.7                                                       | 0.91                                                     | 2.45                    | 2.3·10 <sup>-6</sup>                  |
| TO-F/Mn-04               | 188.9                                                       | 0.87                                                     | 2.27                    | 5.7·10 <sup>-6</sup>                  |
| TO-F/Mn-06               | 203.0                                                       | 0.88                                                     | 2.00                    | 4.0·10 <sup>-6</sup>                  |

\* The surface area and total pore volume were determined by the density functional theory equation.

**Table S2.** Quantification results obtained by XPS analysis for the TO-Mn/F/N-06 sample

|                     | Ti 2p <sub>3/2</sub> | O 1s         | Mn 2p <sub>3/2</sub> | F 1s         | N 1s  | C 1s            |
|---------------------|----------------------|--------------|----------------------|--------------|-------|-----------------|
| Binding energy (eV) | 456.5; 458.7         | 529.6; 532.1 | 641.6; 643.8         | 683.9; 688.6 | 400.1 | 285; 286.3; 289 |
| Content (at.%)      | 27.9                 | 58.2         | 1.3                  | 2.7          | 0.8   | 9.1             |

**Table S3.** The Rietveld refinement results for structures existed in unmodified and (Mn, F, N) co-doped TiO<sub>2</sub> samples

| Sample                   | TiO <sub>2</sub> (B) |              |              |            |                            | Anatase      |              |                            |
|--------------------------|----------------------|--------------|--------------|------------|----------------------------|--------------|--------------|----------------------------|
|                          | <i>a</i> (Å)         | <i>b</i> (Å) | <i>c</i> (Å) | β (°)      | <i>V</i> (Å <sup>3</sup> ) | <i>a</i> (Å) | <i>c</i> (Å) | <i>V</i> (Å <sup>3</sup> ) |
| Undoped TiO <sub>2</sub> | 12.1192(8)           | 3.7591(2)    | 6.5229(4)    | 107.55(1)  | 283.34(2)                  | 3.7616(1)    | 9.384(4)     | 132.77(3)                  |
| TO-Mn/F/N-02             | 12.1909(7)           | 3.7427(2)    | 6.6435(4)    | 110.192(8) | 284.49(2)                  | 3.7586(4)    | 9.401(1)     | 132.80(3)                  |
| TO-Mn/F/N-04             | 12.2562(6)           | 3.7569(3)    | 6.6692(4)    | 110.896(9) | 286.89(3)                  | 3.7710(1)    | 9.438(2)     | 134.21(2)                  |
| TO-Mn/F/N-06             | 12.2431(7)           | 3.7545(4)    | 6.7258(7)    | 111.45(1)  | 287.74(3)                  | 3.7750(1)    | 9.4457(2)    | 134.61(3)                  |

**Table S4.** Spin Hamiltonian parameters used to simulate the EPR spectra of Mn<sup>4+</sup> ions in crystal fields with strong rhombic distortion

| Spectrum | <i>g</i> -factor | <i>E/D</i> | <i>A</i> (MHz) | $\Delta B$ (MHz) |
|----------|------------------|------------|----------------|------------------|
| <i>a</i> | 2.00             | 1/3        | 245            | 5.4              |
| <i>b</i> | 2.00             | 1/3        | 245            | 23               |

The spin Hamiltonian in the calculations had the following form:  $\hat{H}=g\beta(\vec{B},\vec{S})+D\left(\hat{S}_z^2-\frac{S(S+1)}{3}\right)+E\left(\hat{S}_x^2-\hat{S}_y^2\right)+A(\vec{I},\vec{S})$ , where  $\beta$  is the Bohr magneton,  $\vec{B}$  is the applied magnetic field, *g* is the spectroscopic splitting factor,  $\vec{S}$  is the vector of the spin angular momentum of the system,  $\hat{S}_x$ ,  $\hat{S}_y$  и  $\hat{S}_z$  – spin angular momentum operators along the x, y, and z axes, respectively, *S* is the spin value, *D* and *E* are the axial and rhombic components of the crystal field, respectively,  $\vec{I}$  is the nuclear spin angular momentum vector, *A* is the constant of hyperfine structure (HFS). The calculations were performed under the assumption that *E* and *D* >>  $g\beta|\vec{B}|$ . The shape of the individual HFS line was Lorentzian.

**Table S5.** Calculated EIS parameters for unmodified and (Mn, F, N) co-doped TiO<sub>2</sub> samples

| Sample                   | <i>R<sub>el</sub></i> (Ω)* | <i>R<sub>b</sub></i> (kΩ) | <i>C<sub>g</sub></i>                                             |             | $\chi^2$   |
|--------------------------|----------------------------|---------------------------|------------------------------------------------------------------|-------------|------------|
|                          |                            |                           | <i>Q<sub>g</sub></i> (S cm <sup>-1</sup> s <sup><i>n</i></sup> ) | <i>n</i>    |            |
| Undoped TiO <sub>2</sub> | 83.26                      | 223.59±2.79               | (1.57±0.02)·10 <sup>-9</sup>                                     | 0.717±0.001 | 0.0019348  |
| TO-Mn/F/N-02             | 83.26                      | 52.02±0.81                | (3.3±0.3)·10 <sup>-10</sup>                                      | 0.87±0.01   | 0.000733   |
| TO-Mn/F/N-04             | 83.26                      | 5.26±0.07                 | (1.27±0.14)·10 <sup>-8</sup>                                     | 0.686±0.007 | 0.00036213 |
| TO-Mn/F/N-06             | 83.26                      | 16.83±0.28                | (4.37±0.43)·10 <sup>-9</sup>                                     | 0.71±0.01   | 0.00040345 |

\* When fitting the *R<sub>el</sub>* values were fixed at 83.26 Ω for all samples.

**Table S6.** Electrochemical performance of the doped TiO<sub>2</sub>(B) anodes in lithium-ion batteries

| Material                                                      | Initial charge/discharge capacity                          | Cycling performance                                                      | Rate capability                                         | Reference (year) |
|---------------------------------------------------------------|------------------------------------------------------------|--------------------------------------------------------------------------|---------------------------------------------------------|------------------|
| Fe-doped TiO <sub>2</sub> (B) nanorods <sup>#</sup>           | 490/219 mAh g <sup>-1</sup><br>at 33.5 mA g <sup>-1</sup>  | 170 mAh g <sup>-1</sup> after 15 cycles<br>at 33.5 mA g <sup>-1</sup>    | 163 mAh g <sup>-1</sup><br>at 1675 mA g <sup>-1</sup>   | [1] (2015)       |
| Ca-doped TiO <sub>2</sub> (B) thin films                      | 293/226 mAh g <sup>-1</sup><br>at 335 mA g <sup>-1</sup>   | 102 mAh g <sup>-1</sup> after 200 cycles<br>at 26,800 mA g <sup>-1</sup> | 248 mAh g <sup>-1</sup><br>at 3350 mA g <sup>-1</sup>   | [2] (2014)       |
| (Co, V) co-doped TiO <sub>2</sub> (B) nanobelts <sup>†</sup>  | 265/239 mAh g <sup>-1</sup><br>at 167.5 mA g <sup>-1</sup> | 256 mAh g <sup>-1</sup> after 50 cycles<br>at 167.5 mA g <sup>-1</sup>   | Not provided                                            | [3] (2018)       |
| Nb-doped TiO <sub>2</sub> (B) thin films                      | 273/208 mAh g <sup>-1</sup><br>at 167.5 mA g <sup>-1</sup> | 115 mAh g <sup>-1</sup> after 100 cycles at 16,750 mA g <sup>-1</sup>    |                                                         | [4] (2013)       |
| V-doped TiO <sub>2</sub> (B) nanotubes                        | 334/286 mAh g <sup>-1</sup><br>at 150 mA g <sup>-1</sup>   | 133 mAh g <sup>-1</sup> after 100 cycles<br>at 3000 mA g <sup>-1</sup>   | 114 mAh g <sup>-1</sup><br>at 6000 mA g <sup>-1</sup>   | [5] (2020)       |
| Cu-doped TiO <sub>2</sub> (B) nanowires                       | 319/252 mAh g <sup>-1</sup><br>at 167.5 mA g <sup>-1</sup> | 119 mAh g <sup>-1</sup> after 2000 cycles<br>at 2010 mA g <sup>-1</sup>  | 51 mAh g <sup>-1</sup><br>at 20,100 mA g <sup>-1</sup>  | [6] (2016)       |
| Ni-doped TiO <sub>2</sub> (B) nanobelts                       | 254/189 mAh g <sup>-1</sup><br>at 50 mA g <sup>-1</sup>    | 173 mAh g <sup>-1</sup> after 100 cycles<br>at 50 mA g <sup>-1</sup>     | 104 mAh g <sup>-1</sup><br>at 1800 mA g <sup>-1</sup>   | [7] (2021)       |
| C-doped TiO <sub>2</sub> (B) nanowires                        | 306/278 mAh g <sup>-1</sup><br>at 33.5 mA g <sup>-1</sup>  | 160 mAh g <sup>-1</sup> after 1000 cycles<br>at 3350 mA g <sup>-1</sup>  |                                                         | [8] (2015)       |
| P-doped TiO <sub>2</sub> (B) nanowire arrays <sup>*</sup>     | 712/434 mAh g <sup>-1</sup><br>at 167.5 mA g <sup>-1</sup> | 153 mAh g <sup>-1</sup> after 3000 cycles at<br>3350 mA g <sup>-1</sup>  | 141 mAh g <sup>-1</sup><br>at 10,050 mA g <sup>-1</sup> | [9] (2018)       |
| N-doped TiO <sub>2</sub> (B) nanosheets with N-doped graphene | 583/479 mAh g <sup>-1</sup><br>at 201 mA g <sup>-1</sup>   | 338 mAh g <sup>-1</sup> after 100 cycles at 201<br>mA g <sup>-1</sup>    | 153 mAh g <sup>-1</sup><br>at 16,750 mA g <sup>-1</sup> | [10] (2016)      |
| (N, B) co-doped TiO <sub>2</sub> (B) nanotubes                | 399/276 mAh g <sup>-1</sup><br>at 30 mA g <sup>-1</sup>    | 140 mAh g <sup>-1</sup> after 500 cycles at 12,000 mA g <sup>-1</sup>    |                                                         | [11] (2015)      |

|                                                    |                                                         |                                                                      |                                                       |                  |
|----------------------------------------------------|---------------------------------------------------------|----------------------------------------------------------------------|-------------------------------------------------------|------------------|
| (Mn, F, N) co-doped TiO <sub>2</sub> (B) nanotubes | 358/244 mAh g <sup>-1</sup><br>at 70 mA g <sup>-1</sup> | 232 mAh g <sup>-1</sup> after 100 cycles<br>at 70 mA g <sup>-1</sup> | 134 mAh g <sup>-1</sup><br>at 1500 mA g <sup>-1</sup> | This work (2023) |
|----------------------------------------------------|---------------------------------------------------------|----------------------------------------------------------------------|-------------------------------------------------------|------------------|

<sup>#</sup> The data are obtained in a narrow potential interval of 1.2–2.2 V.

<sup>†</sup> The cycling performance data are given in terms of charge (lithiation) capacity.

<sup>\*</sup> The data are given for a wide potential range of 0.01–3.0 V.

**Table S7.** The fitting results for EIS spectra of electrodes based on undoped TiO<sub>2</sub> and TO-Mn/F/N-04 sample and the calculated lithium diffusion coefficient values

| Sample                   | $R_s$ ( $\Omega$ ) | $R_f$ ( $\Omega$ ) | $R_{ct}$ ( $\Omega$ ) | $\sigma_w$ ( $\Omega \cdot s^{-1/2}$ ) | $D_{Li}$ (cm <sup>2</sup> s <sup>-1</sup> ) |
|--------------------------|--------------------|--------------------|-----------------------|----------------------------------------|---------------------------------------------|
| Undoped TiO <sub>2</sub> | 1.6                | 40.5               | 196.4                 | 81.5                                   | $1.0 \times 10^{-11}$                       |
| TO-Mn/F/N-04             | 1.4                | 45.2               | 132.8                 | 59.1                                   | $2.1 \times 10^{-11}$                       |



## References

1. Grosjean, R.; Fehse, M.; Pigeot-Remy, S.; Stievano, L.; Monconduit, L.; Cassaignon, S. Facile Synthetic Route towards Nanostructured Fe-TiO<sub>2</sub>(B), Used as Negative Electrode for Li-Ion Batteries. *J. Power Sources* **2015**, *278*, 1–8, doi:10.1016/j.jpowsour.2014.12.032.
2. Zhang, K.; Katz, M.B.; Li, B.; Kim, S.J.; Du, X.; Hao, X.; Jokisaari, J.R.; Zhang, S.; Graham, G.W.; Van der Ven, A.; et al. Water-Free Titania-Bronze Thin Films with Superfast Lithium-Ion Transport. *Adv. Mater.* **2014**, *26*, 7365–7370, doi:10.1002/adma.201401757.
3. Amirsalehi, M.; Askari, M. Influence of Vanadium, Cobalt-Codoping on Electrochemical Performance of Titanium Dioxide Bronze Nanobelts Used as Lithium Ion Battery Anodes. *J. Mater. Sci. Mater. Electron.* **2018**, *29*, 13068–13076, doi:10.1007/s10854-018-9429-x.
4. Ventosa, E.; Mei, B.; Xia, W.; Muhler, M.; Schuhmann, W. TiO<sub>2</sub>(B)/Anatase Composites Synthesized by Spray Drying as High Performance Negative Electrode Material in Li-Ion Batteries. *ChemSusChem* **2013**, *6*, 1312–1315, doi:10.1002/cssc.201300439.
5. Opra, D.P.; Gnedenkov, S.V.; Sokolov, A.A.; Podgorbunsky, A.B.; Ustinov, A.Y.; Mayorov, V.Y.; Kuryavyi, V.G.; Sinebryukhov, S.L. Vanadium-Doped TiO<sub>2</sub>-B/Anatase Mesoporous Nanotubes with Improved Rate and Cycle Performance for Rechargeable Lithium and Sodium Batteries. *J. Mater. Sci. Technol.* **2020**, *54*, 181–189, doi:10.1016/j.jmst.2020.02.068.
6. Zhang, Y.; Meng, Y.; Zhu, K.; Qiu, H.; Ju, Y.; Gao, Y.; Du, F.; Zou, B.; Chen, G.; Wei, Y. Copper-Doped Titanium Dioxide Bronze Nanowires with Superior High Rate Capability for Lithium Ion Batteries. *ACS Appl. Mater. Interfaces* **2016**, *8*, 7957–7965, doi:10.1021/acsami.5b10766.
7. Opra, D.P.; Gnedenkov, S. V.; Sinebryukhov, S.L.; Gerasimenko, A. V.; Ziatdinov, A.M.; Sokolov, A.A.; Podgorbunsky, A.B.; Ustinov, A.Y.; Kuryavyi, V.G.; Mayorov, V.Y.; et al. Enhancing Lithium and Sodium Storage Properties of TiO<sub>2</sub>(B) Nanobelts by Doping with Nickel and Zinc. *Nanomaterials* **2021**, *11*, 1703, doi:10.3390/nano11071703.
8. Goriparti, S.; Miele, E.; Prato, M.; Scarpellini, A.; Marras, S.; Monaco, S.; Toma, A.; Messina, G.C.; Alabastri, A.; Angelis, F. De; et al. Direct Synthesis of Carbon-Doped TiO<sub>2</sub>-Bronze Nanowires as Anode Materials for High Performance Lithium-Ion Batteries. *ACS Appl. Mater. Interfaces* **2015**, *7*, 25139–25146, doi:10.1021/acsami.5b06426.
9. Cao, M.; Tao, L.; Lv, X.; Bu, Y.; Li, M.; Yin, H.; Zhu, M.; Zhong, Z.; Shen, Y.; Wang, M. Phosphorus-Doped TiO<sub>2</sub>-B Nanowire Arrays Boosting Robust Pseudocapacitive Properties for Lithium Storage. *J. Power Sources* **2018**, *396*, 327–334, doi:10.1016/j.jpowsour.2018.06.012.
10. Han, Z.; Peng, J.; Liu, L.; Wang, G.; Yu, F.; Guo, X. Few-Layer TiO<sub>2</sub>-B Nanosheets with N-Doped Graphene Nanosheets as a Highly Robust Anode for Lithium-Ion Batteries. *RSC Adv.* **2017**, *7*, 7864–7869, doi:10.1039/C6RA26929J.
11. Chen, C.; Hu, X.; Zhang, B.; Miao, L.; Huang, Y. Architectural Design and Phase Engineering of N/B-Codoped TiO<sub>2</sub>(B)/Anatase Nanotube Assemblies for High-Rate and Long-Life Lithium Storage. *J. Mater. Chem. A* **2015**, *3*, 22591–22598, doi:10.1039/C5TA06884C.
